# Supplementary material
Source: publisher figshare collection journal article supplement (https://rs.figshare.com/ndownloader/files/9288715)
Supplement: Supplementary file 1 [file 9288715]

## Sheet: Data
sample	year	moclone	mosex	mofungus	faclone	fafungus	mass	pmety
1	2010	8	Male	cla	17	cla	5.9	7.089
2	2010	6	Female	nm	20	hoi	6.1	0.989
3	2010	1	Female	cla	20	hoi	2.1	0.140057
5	2013	14	Male	hoi	22	hoi	5.5	1.50568
6	2010	7	Male	hoi	14	hoi	5.6	0.601397
7	2010	24	Female	cla	14	cla	5.1	0.675611
8	2010	22	Male	hoi	14	hoi	5.1	1.237
9	2010	22	Male	hoi	22	hoi	4.3	0.473516
13	2013	1	Female	nm	8	nm	4.6	0.799401
14	2013	6	Female	nm	17	nm	5.3	1.46075
15	2010	1	Female	cla	20	hoi	5.1	0.456359
16	2010	1	Female	cla	5	nm	4.8	2.30619
17	2010	1	Female	nm	5	nm	4.9	0.478404
18	2013	6	Female	nm	8	nm	5.5	0.460349
19	2010	6	Female	cla	20	hoi	5.7	0.537556
20	2010	12	Male	nm	12	nm	4.1	0.468529
21	2013	20	Male	cla	2	cla	5.9	0.601995
22	2010	22	Male	hoi	14	nm	6.2	0.501147
23	2010	4	Female	hoi	17	cla	4.8	1.99684
24	2010	5	Male	hoi	14	nm	3.5	0.335761
27	2010	6	Female	nm	20	cla	6.2	2.14299
28	2010	6	Female	nm	14	hoi	4.8	0.53985
29	2010	12	Male	nm	12	nm	6	0.383042
30	2013	24	Female	hoi	8	cla	5.8	1.15057
31	2013	4	Female	hoi	14	cla	5	0.38414
34	2010	20	Male	hoi	12	nm	6.2	1.13576
35	2010	24	Female	hoi	2	nm	5.5	2.77778
36	2010	2	Male	cla	14	cla	5.4	5.89615
39	2010	2	Male	cla	17	cla	5.2	0.923791
40	2010	24	Female	cla	22	hoi	5.3	0.453367
41	2010	22	Male	hoi	14	nm	5	0.638005
43	2013	14	Male	nm	22	hoi	5.5	0.856958
44	2010	4	Female	cla	17	cla	4.2	0.899451
46	2010	5	Male	hoi	14	nm	5.2	0.457756
48	2013	2	Male	cla	20	hoi	4.1	0.530873
51	2010	14	Male	cla	20	cla	4.2	1.24815
52	2010	6	Female	nm	12	nm	5	2.17203
53	2010	20	Male	hoi	12	nm	2.9	0.568371
54	2010	20	Male	cla	14	hoi	6.2	4.11932
56	2013	17	Male	nm	12	cla	5	0.692683
57	2010	8	Male	hoi	17	nm	5.1	1.49992
58	2013	17	Male	nm	8	cla	5.1	0.551062
59	2013	6	Female	cla	22	hoi	4.6	2.13763
60	2013	24	Female	cla	22	hoi	4.3	1.65215
61	2010	6	Female	cla	14	hoi	5.9	1.01212
62	2010	20	Male	cla	14	hoi	6.1	2.13407
64	2013	2	Male	cla	8	nm	4.8	0.746184
65	2013	7	Male	cla	8	nm	5.8	0.321322
66	2013	6	Female	cla	17	nm	4.5	2.09501
67	2013	6	Female	cla	17	nm	5.3	0.738316
68	2013	6	Female	cla	14	nm	6.7	0.939732
70	2012	1	Female	nm	20	cla	5.6	0.617152
71	2012	1	Female	nm	14	hoi	5.6	1.09394
72	2012	1	Female	nm	14	hoi	5.6	0.790244
73	2012	1	Female	nm	12	cla	6.6	2.11676
74	2012	1	Female	nm	17	cla	6.4	0.516444
75	2012	6	Female	cla	20	cla	6.4	1.26546
76	2012	6	Female	cla	14	nm	7.4	1.94681
77	2012	4	Female	nm	14	nm	4.8	0.324469
78	2012	4	Female	nm	17	cla	6.7	1.14115
79	2012	4	Female	nm	20	cla	4.1	2.34965
80	2010	6	Female	cla	20	cla	5.4	1.33807
81	2013	6	Female	cla	2	cla	5.5	0.4
82	2013	6	Female	cla	5	cla	5.6	2.27884
83	2010	1	Female	cla	5	nm	4.5	0.714713
84	2013	14	Male	nm	8	cla	5.8	1.24028
87	2013	7	Male	hoi	5	cla	5.3	2.07742
88	2010	6	Female	cla	14	nm	6	1.75012
89	2013	7	Male	hoi	7	hoi	4.9	0.705271
92	2013	4	Female	hoi	14	cla	4.8	2.26326
93	2013	4	Female	hoi	17	nm	5	0.707782
94	2013	4	Female	hoi	17	nm	4.8	0.540418
95	2013	4	Female	hoi	20	cla	4.4	1.32513
96	2013	14	Male	hoi	14	hoi	4.8	0.396653
98	2013	2	Male	hoi	22	hoi	4.5	0.802176
100	2013	14	Male	hoi	2	hoi	5.9	6.28093
101	2013	14	Male	nm	5	cla	5.8	1.93054
104	2013	6	Female	nm	8	nm	6.3	0.519498
106	2010	1	Female	cla	5	nm	5	0.742929
107	2010	24	Female	hoi	14	nm	4.9	0.36887
108	2010	2	Male	nm	20	cla	5	1.22611
109	2013	1	Female	cla	2	cla	5.2	0.887029
112	2013	6	Female	cla	22	hoi	6.2	0.311799
113	2013	16	Female	cla	8	nm	4.5	0.413389
114	2013	4	Female	nm	8	nm	3.9	1.82008
115	2013	4	Female	hoi	17	nm	4.7	0.411381
116	2013	4	Female	nm	14	cla	4.8	0.28887
117	2013	2	Male	hoi	20	cla	4.5	3.3065
118	2013	2	Male	hoi	22	hoi	4.9	0.490544
119	2013	2	Male	hoi	22	hoi	3.4	0.451715
121	2013	2	Male	hoi	2	hoi	4.9	0.75364
123	2013	2	Male	cla	8	nm	4.6	0.546444
124	2013	24	Female	hoi	8	cla	6.3	1.26106
125	2013	24	Female	hoi	8	cla	5.3	0.524519
126	2013	14	Male	nm	7	hoi	5.5	1.26901
127	2010	22	Male	hoi	22	hoi	4.5	0.391967
128	2010	7	Male	hoi	14	hoi	5.4	0.348452
130	2013	14	Male	nm	12	hoi	5.9	0.74728
132	2013	14	Male	hoi	22	hoi	6.5	0.661423
135	2013	17	Male	nm	17	nm	5.1	0.420739
137	2010	22	Male	hoi	14	nm	6	0.572869
138	2010	6	Female	nm	20	hoi	5.9	1.40952

## Sheet: Metadata
sample	Sample ID
polli_year	Year when pollinations were performed
moclone	Clone ID of the mother producing the seeds
mosex	Gender of the mother producing the seeds
mofungus	Fungal treatment of the mother producing the seeds
faclone	Clone ID of the father siring the seeds
fafungus	Gender of the father siring the seeds
mass	Fungal treatment of the father siring the seeds
pmety	Proportion of methylated DNA (%)
